# Supplementary material for: Computational Insights into the Dynamic Structural Features and Binding Characteristics of Recombinase UvsX Compared with RecA
Source: MDPI journal article supplement (doi:10.3390/molecules28083363), 2023-04-11
Supplement: s1 [file s1]

## Support Information

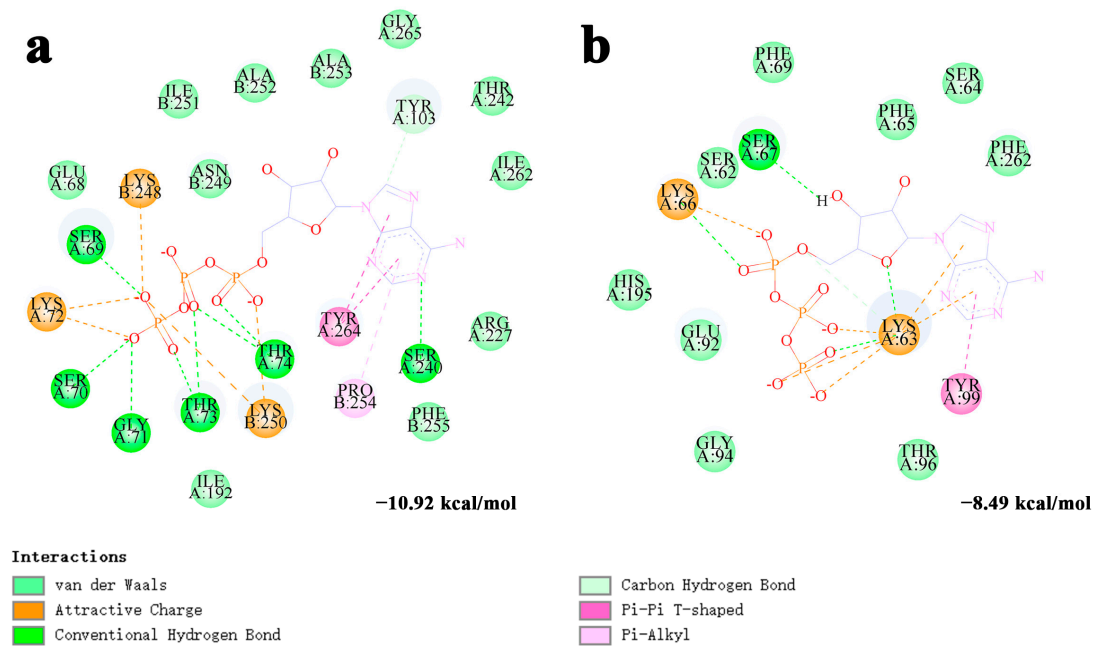

**Figure S1.** The interaction between ATP and protein after docking. **a.** RecA, **b.** UvsX.

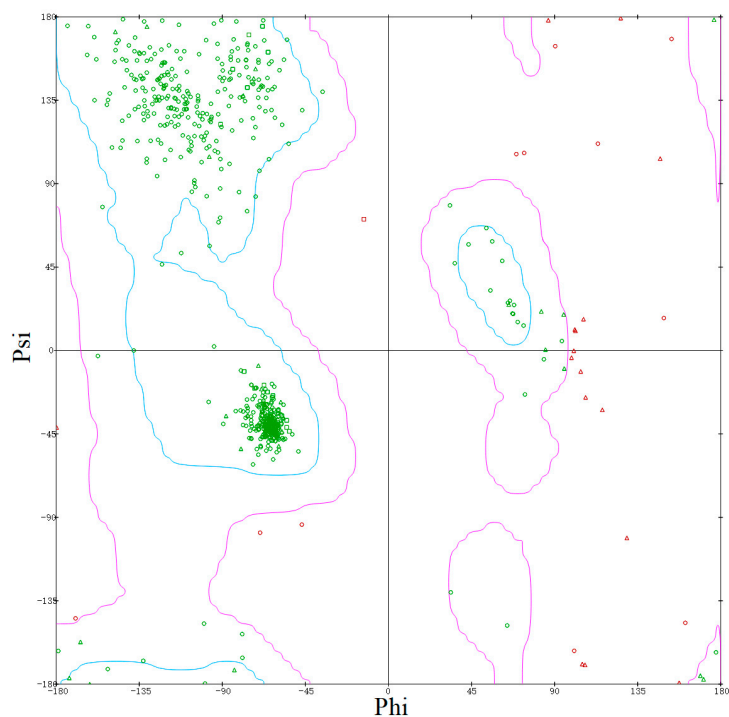

**Figure S2.** Ramachandran diagram of UvsX protein formed by modeling. The most favoured regions are winded in blue, while the allowed regions are winded in pink.

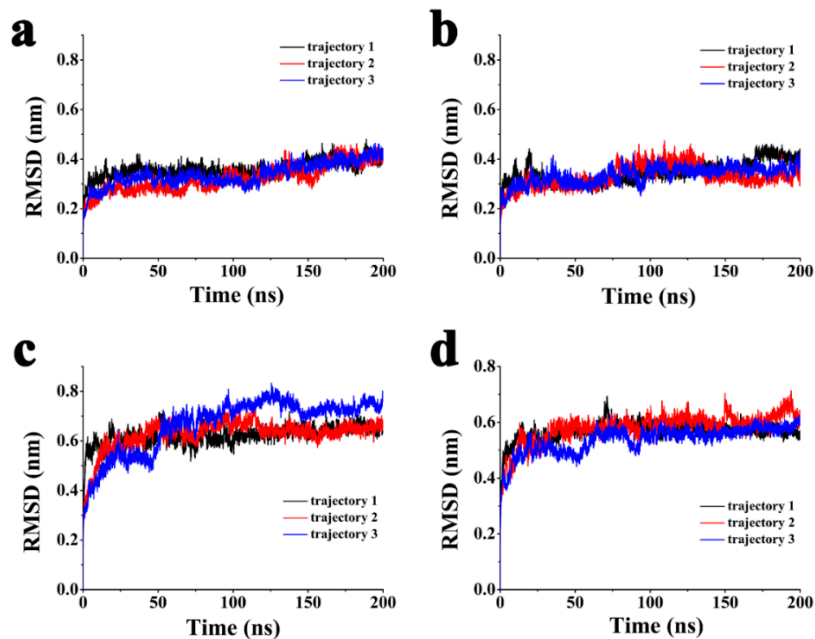

**Figure S3.** Root mean square deviation of each system in three 200ns independent molecular dynamics simulation trajectories. a. RecA-298K, b. RecA-310K, c. UvsX-298K, d. UvsX-310K.

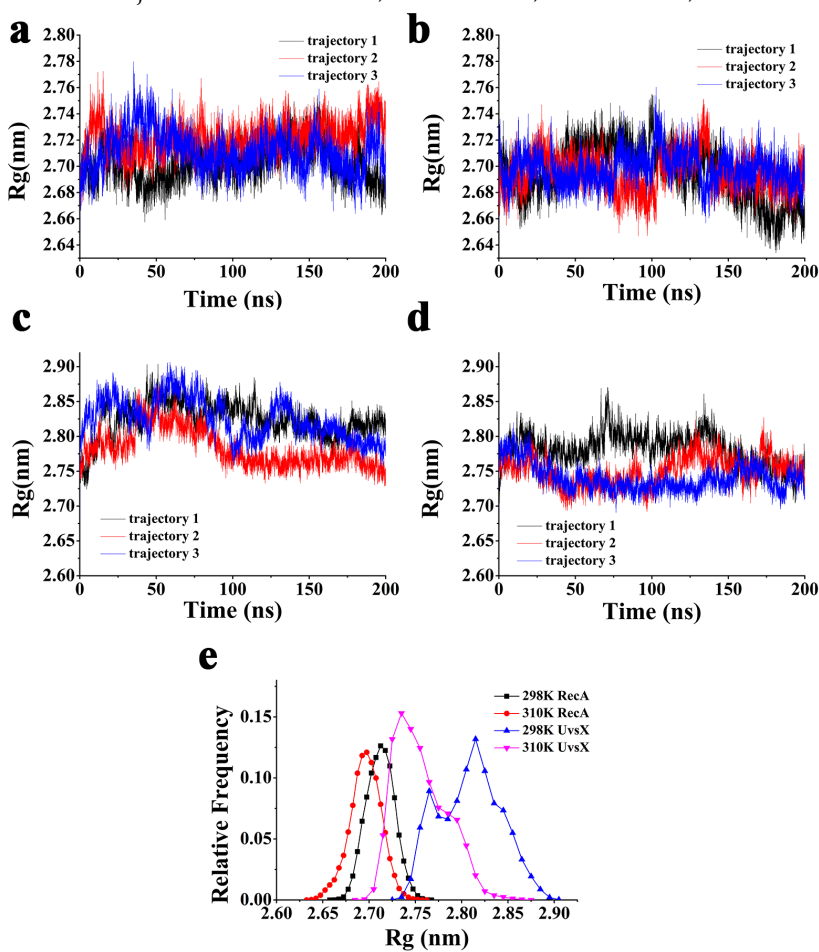

**Figure S4.** Rg values of each system in three 200ns independent molecular dynamics simulation trajectories. a. RecA-298K, b. RecA-310K, c. UvsX-298K, d. UvsX-310K. e. Relative frequency of Rg values. (The three trajectories after 50ns were combined to calculate.)

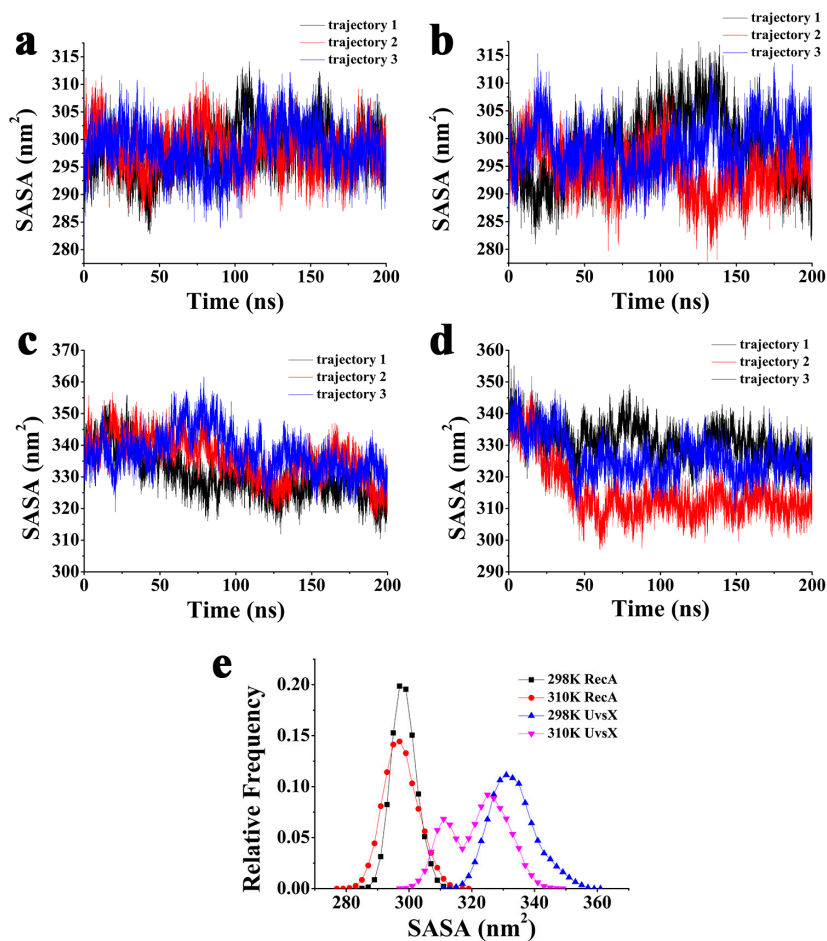

**Figure S5.** The solvent accessible surface area (SASA) values of each system in three 200ns independent molecular dynamics simulation trajectories. a. RecA-298K, b. RecA-310K, c. UvsX-298K, d. UvsX-310K. f. Relative frequency of SASA values. (The three trajectories after 50ns were combined to calculate.)

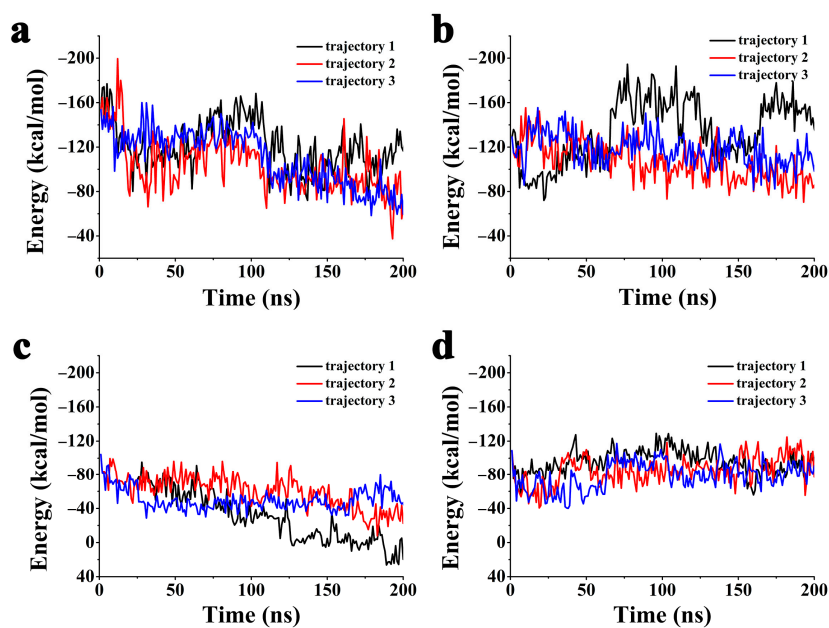

**Figure S6.** ATP binding free energy curves of each system in three 200ns independent molecular dynamics simulation trajectories. a. RecA-298K, b. RecA-310K, c. UvsX-298K, d. UvsX-310K.

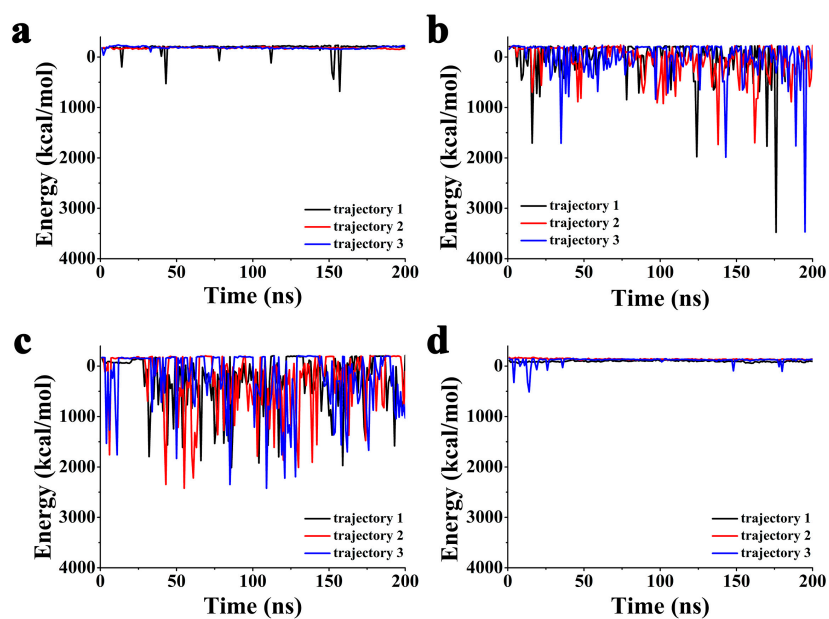

**Figure S7.** DNA binding free energy curves of each system in three 200ns independent molecular dynamics simulation trajectories. a. RecA-298K, b. RecA-310K, c. UvsX-298K, d. UvsX-310K.

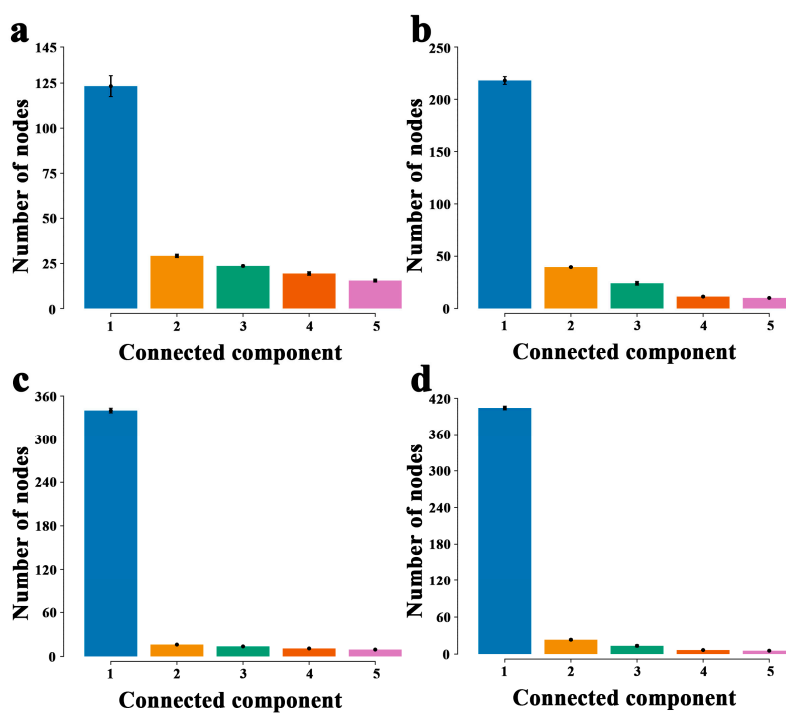

**Figure S8.** Number of nodes in the first five connected components at different cut-offs in RecA. a. 4.9 Å b. 5.0 Å c. 5.1 Å d. 5.2 Å

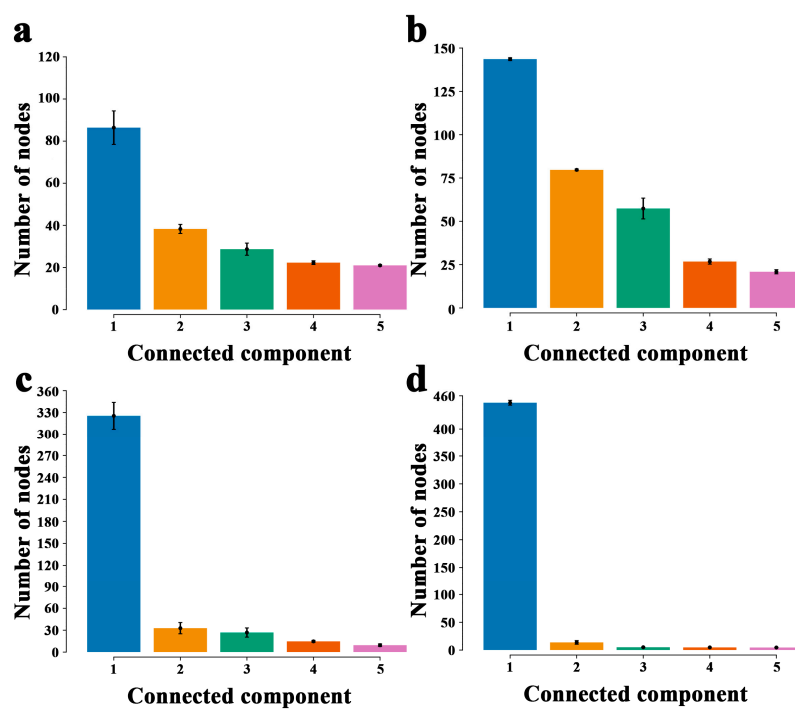

**Figure S9.** Number of nodes in the first five connected components at different cut-offs in UvsX. a. 4.9 Å  
b. 5.0 Å c. 5.1 Å d. 5.2 Å
